# Supplementary material
Source: PubMed Central journal article supplement (PMC8842838)
Supplement: NIHMS1774982-supplement-Supplementary_material.pdf [file NIHMS1774982-supplement-Supplementary_material.pdf]

Estimating the high-arsenic domestic-well population in the conterminous United States

By Joseph D. Ayotte, Laura Medalie, Sharon L. Qi, Lorraine C. Backer, and Bernard T. Nolan

Supporting Information

16 pages

3 figures

4 tables

**Table SI\_1. List of potential independent variables for LR model with data-source citations**

| <b>Data set</b>                           | <b>Description</b>                                                                                                                | <b>units or scale</b> | <b>Citation or URL</b>                                                                                                                                                                                                                                                                                                          |
|-------------------------------------------|-----------------------------------------------------------------------------------------------------------------------------------|-----------------------|---------------------------------------------------------------------------------------------------------------------------------------------------------------------------------------------------------------------------------------------------------------------------------------------------------------------------------|
| <b>Geologic and geochemical variables</b> |                                                                                                                                   |                       |                                                                                                                                                                                                                                                                                                                                 |
| Bedrock Geology: King and Beikman         | Bedrock geology based on King and Beikman 1974 map                                                                                | Categorical variables | Schruben, P.G., Arndt, R.E., Bawiec, W.J., 1997, Geology of the Conterminous United States at 1:2,500,000 Scale--A Digital Representation of the 1974 P.B. King and H.M. Beikman Map: U.S. Geological Survey Digital Data Series DDS-11 release 2, 26 p.                                                                        |
| Bedrock Geology: Reed                     | Geology for North America (Reed)                                                                                                  | Categorical variables | Reed, J.C. Jr., and Bush, C.A., 2005, Generalized geologic map of the Conterminous United States, ed 1.2: U.S. Geological Survey Map.                                                                                                                                                                                           |
| Bedrock Geology: State Maps               | mosaic of state geology maps                                                                                                      | Categorical variables | Schweitzer, Peter N. , 2011, Combined geologic map data for the conterminous US derived from the USGS state geologic map compilation.                                                                                                                                                                                           |
| Stream Sediment Geochemistry              | Geochemical data across the U.S. based primarily on stream sediments analyzed using a consistent set of methods.                  | Number, in mg/kg      | U.S. Geological Survey, 2004, The National Geochemical Survey - database and documentation, Edition 1.5: U.S. Geological Survey Open-File Report 2004-1001                                                                                                                                                                      |
| Soil Geochmestry                          | Geochemical data across the U.S. based on multi horizon sediments analyzed using a consistent set of methods.                     | Number, in mg/kg      | Smith, D.B., Cannon, W.F., Woodruff, L.G., Solano, Federico, and Ellefsen, K.J., 2014, Geochemical and mineralogical maps for soils of the conterminous United States: U.S. Geological Survey Open-File Report 2014-1082, 386 p., <a href="https://dx.doi.org/10.3133/ofr20141082">https://dx.doi.org/10.3133/ofr20141082</a> . |
| Surficial Geology                         | 20 categories describing the nature and origin of surficial materials, with emphasis on carbonate versus non-carbonate materials. | Categorical variables | Cress, Jill, Soller, David, Sayre, Roger, Comer, Patrick, and Warner, Harumi, 2010, Terrestrial ecosystems—Surficial lithology of the conterminous United States: U.S. Geological Survey Scientific Investigations Map 3126, scale 1:5,000,000, 1 sheet.                                                                        |
| <b>Hydrologic variables</b>               |                                                                                                                                   |                       |                                                                                                                                                                                                                                                                                                                                 |
| Annual Evapotranspiration (ET11)          | Actual ET represents the part of irrigation water that is evaporated and/or transpired and is not available for immediate reuse.  | Integer, in mm        | Savoca, M.E., Senay, G.B., Maupin, M.A., Kenny, J.F., and Perry, C.A., 2013, Actual evapotranspiration modeling using the operational Simplified Surface Energy Balance (SSEBop) approach: U.S. Geological Survey Scientific Investigations Report 2013-5126, 16 p.                                                             |
| Base Flow Index                           | The ratio of annual baseflow to the total annual runoff at 1-km grid spacing.                                                     | Integer, unit         | Wolock, D.M., 2003, Base-flow index grid for the conterminous United States: U.S. Geological Survey Open-File Report 03-263, digital data set                                                                                                                                                                                   |
| PET                                       | Potential Evapotranspiration                                                                                                      | Number, in inches     | James Falcone, USGS, written communication, 2015                                                                                                                                                                                                                                                                                |

|                         |                                                                                                                       |                         |                                                                                                                                                                                                             |
|-------------------------|-----------------------------------------------------------------------------------------------------------------------|-------------------------|-------------------------------------------------------------------------------------------------------------------------------------------------------------------------------------------------------------|
| Precipitation           | 30-year normal annual precipitation for 1981 through 2010                                                             | Number, in inches       | <a href="http://prism.oregonstate.edu">http://prism.oregonstate.edu</a>                                                                                                                                     |
| Precipitation Minus PET | Precipitation minus potential evapotranspiration                                                                      | Integer, in inches/year | <a href="https://www.usgs.gov/media/images/map-gridded-values-1971-2000-avg-precipitation-minus-avg-pet">https://www.usgs.gov/media/images/map-gridded-values-1971-2000-avg-precipitation-minus-avg-pet</a> |
| Recharge to Groundwater | Mean annual natural groundwater recharge created by multiplying a grid of BFI by a grid of mean annual runoff values. | Integer, in mm/year     | Wolock, D.M., 2003, Estimated mean annual natural ground-water recharge in the conterminous United States: U.S. Geological Survey Open-File Report 03-311, raster digital data.                             |

---

Process variables

---

|                          |                                                                                                                                 |                       |                                                                                                                                                                                                                                                                                                                                                                                                                                                                           |
|--------------------------|---------------------------------------------------------------------------------------------------------------------------------|-----------------------|---------------------------------------------------------------------------------------------------------------------------------------------------------------------------------------------------------------------------------------------------------------------------------------------------------------------------------------------------------------------------------------------------------------------------------------------------------------------------|
| Closed Basins            | Binary data to indicate whether basin is closed or open. A closed drainage basin allows no outflow to external bodies of water. | 0 or 1                | Coordinated effort between the USDA-NRCS, USGS, and the EPA. The Watershed Boundary Dataset (WBD) was created from a variety of sources from each state and aggregated into a standard national layer for use in strategic planning and accountability. Watershed Boundary Dataset from <a href="https://www.nrcs.usda.gov/wps/portal/nrcs/main/national/water/watersheds/dataset/">https://www.nrcs.usda.gov/wps/portal/nrcs/main/national/water/watersheds/dataset/</a> |
| Distance to stream       | Hydrography                                                                                                                     | Number, in meters     | U.S. Geological Survey, 2016, USGS Small-scale Dataset - Streams and Waterbodies of the United States 200512 Shapefile: U.S. Geological Survey                                                                                                                                                                                                                                                                                                                            |
| Evaporites               | Location of evaporites in subsurface                                                                                            | Categorical variables | Weary, D.J., and Doctor, D.H., 2014, Karst in the United States: A digital map compilation and database: U.S. Geological Survey Open-File Report 2014-1156, 23 p.                                                                                                                                                                                                                                                                                                         |
| Flow Distance Downstream | Based on NHD plus database, distance of point downstream from watershed boundary                                                | Integer, in meters    | Richard Moore, U.S. Geological Survey, 2014, written commun.                                                                                                                                                                                                                                                                                                                                                                                                              |
| Flow Distance Percent    | Based on NHD plus database, percent of point downstream compared to stream length                                               | Percent x 100, unit   | Richard Moore, U.S. Geological Survey, 2014, written commun.                                                                                                                                                                                                                                                                                                                                                                                                              |
| Flow Distance Upstream   | Based on NHD plus database, distance of point upstream from stream outlet                                                       | Integer, in meters    | Richard Moore, U.S. Geological Survey, 2014, written commun.                                                                                                                                                                                                                                                                                                                                                                                                              |
| Percent Irrigated Land   | Estimated percentage of agricultural land subject to a combination of irrigation sources at 1 km grid spacing                   | Percent x 100, unit   | Wieczorek, M., 2005. This data set represents the estimated percentage of the 1-km grid cell that is covered by or subject to the agricultural conservation practice (CPIS05), Combination of Irrigation Sources (CIS) on agricultural land by county (nri_is05): U.S. Geological Survey Raster Digital Data.                                                                                                                                                             |

|                                            |                                                                                                                                                                                                      |                           |                                                                                                                                                                                                                                                                                                                                                                                                                                                                                         |
|--------------------------------------------|------------------------------------------------------------------------------------------------------------------------------------------------------------------------------------------------------|---------------------------|-----------------------------------------------------------------------------------------------------------------------------------------------------------------------------------------------------------------------------------------------------------------------------------------------------------------------------------------------------------------------------------------------------------------------------------------------------------------------------------------|
| State Soil Geographic (STATSGO) Data Base  | STATSGO soil characteristics for the conterminous United States                                                                                                                                      | Various numeric variables | <a href="https://water.usgs.gov/GIS/metadata/usgswrd/XML/muid.xml">https://water.usgs.gov/GIS/metadata/usgswrd/XML/muid.xml</a>                                                                                                                                                                                                                                                                                                                                                         |
| Topographic Wetness Index (TWI)            | A steady state wetness index used to quantify topographic control on hydrological processes: a function of slope and the upstream contributing area per unit width orthogonal to the flow direction. | Integer                   | Wolock, D.M., 2003, Saturation overland flow estimated by TOPMODEL for the conterminous United States: U.S. Geological Survey Open-File Report 03-264, raster digital data.                                                                                                                                                                                                                                                                                                             |
| <b>Other features</b>                      |                                                                                                                                                                                                      |                           |                                                                                                                                                                                                                                                                                                                                                                                                                                                                                         |
| Bouguer Gravity                            | Gravity anomalies produced by density variations within the rocks of the Earth's crust and upper mantle.                                                                                             | Number, in milligal       | Kucks, Robert P., 1999, Bouguer gravity anomaly data grid for the conterminous US: U.S. Geological Survey Digital Data Series DDS-9.                                                                                                                                                                                                                                                                                                                                                    |
| Ecoregions                                 | Ecoregions denote areas of general similarity in ecosystems and in the type, quality, and quantity of environmental resources.                                                                       | Categorical variables     | US Environmental Protection Agency, 2013, Level III Ecoregions of the Conterminous United States, U.S. EPA Office of Research and Development (ORD) - National Health and Environmental Effects Research Laboratory (NHEERL).<br>Gesch, D.B., 2007, The National Elevation Dataset, in Maune, D., ed., Digital Elevation Model Technologies and Applications: The DEM Users Manual, 2nd Edition: Bethesda, Maryland, American Society for Photogrammetry and Remote Sensing, p. 99-118. |
| Elevation                                  | Basic elevation data derived from DEMs                                                                                                                                                               | Number, in meters         | Heath, R.C., 1984, Ground-water regions of the United States: U.S. Geological Survey Water-Supply Paper 2242, 78 p.                                                                                                                                                                                                                                                                                                                                                                     |
| Groundwater regions                        | Classification system of the occurrence and availability of groundwater.                                                                                                                             | Categorical variables     | Wolock, D.M., 2003, Hydrologic landscape regions of the United States: U.S. Geological Survey Open-File Report 03-145, raster digital data.                                                                                                                                                                                                                                                                                                                                             |
| Hydrologic Landscape Regions and Variables | U.S. watersheds grouped according to their similarity in landscape and climate characteristics and their associated hydrologic factors.                                                              | Categorical variables     | Kucks, Robert P., 1999, Isostatic residual gravity anomaly data grid for the conterminous US                                                                                                                                                                                                                                                                                                                                                                                            |
| Isogravity                                 | Gravitational potential                                                                                                                                                                              | Number, in milligal       | Nakagaki, N., Price, C.V., Falcone, J.A., Hitt, K.J., and Ruddy, B.C., Enhanced National Land Cover Data 1992 (NLCDe 92), <a href="http://water.usgs.gov/lookup/getspatial?nlcde92">http://water.usgs.gov/lookup/getspatial?nlcde92</a>                                                                                                                                                                                                                                                 |
| Landcover                                  | Multi-Resolution Land Characteristics Consortium (MRLC) National Land Cover Database (NLCD) at 1 km grid spacing                                                                                     | Categorical variables     |                                                                                                                                                                                                                                                                                                                                                                                                                                                                                         |

|                     |                                           |                            |                                                                                                                                                                                                               |
|---------------------|-------------------------------------------|----------------------------|---------------------------------------------------------------------------------------------------------------------------------------------------------------------------------------------------------------|
| Percent Tile Drains | County-based data                         | Percent x 100,<br>unit     | <a href="http://www.wri.org/publication/assessing-us-farm-drainage">http://www.wri.org/publication/assessing-us-farm-drainage</a>                                                                             |
| Stream Density      | Density of streams                        | Number, per<br>square mile | U.S. Geological Survey, 2016, USGS Small-scale Dataset - Streams and Waterbodies of the United States 200512 Shapefile: U.S. Geological Survey                                                                |
| Volcano Distance    | Distance of well from the nearest volcano | Number, in<br>meters       | Smithsonian Institution, Global Volcanism Program, National Atlas of the United States, and the United States Geological Survey, 2004, U.S. National Atlas Volcanoes, ESRI® Data & Maps, vector digital data. |

---

## SI\_2 Stacked aquifers analysis

Many areas of the United States have horizontally layered aquifers where domestic wells may be drilled in an upper layer, such as unconsolidated sand and gravel of glacial or alluvial origin, but can also be drilled in a deeper layer, such as porous bedrock. Although not completely understood, the complex interrelationship between various geochemical and physical factors that control arsenic concentrations in groundwater (Welch and others, 2000) means that water withdrawn from distinct layered aquifers may be characterized by different arsenic concentrations, as was found in northern Pennsylvania (Low and Galeone, 2007). Because all of the potential independent variables examined in the models for this study were based on 2-dimensional representations in space, in areas of multiple layered aquifers, there was considerable potential for the arsenic signal from a relatively high-As aquifer to get diluted by mixing results with the signal from a relatively low-As aquifer.

We addressed this concern by adding a general aquifer field to the dataset for each well. Information for many of the wells that was retrieved from the National Water Information System (NWIS) was entered by USGS hydrologists and included some designation of either aquifer name or aquifer code. Information from five NWIS fields related to aquifers, at times variously or inconsistently populated, was consolidated into the single general aquifer field. About 14% of the wells in our study did not have any information with which to assign a general aquifer and were given the aquifer designation of 'unknown'.

Frequency distributions of wells with As > 10 ug/L in each state were compared by general aquifer (table S2). For each state, the general aquifer with the largest percentage of domestic wells with As > 10 ug/L was flagged as potentially dominant in areas of stacked aquifers. For example, in Arizona, 63% of the wells in the sand and gravel aquifer had As > 10, whereas 33% of wells in the carbonate rock aquifer, 26% of wells in unknown aquifers, and 10% in the bedrock aquifer had As > 10; thus, the sand and gravel aquifer was potentially dominant. In order to designate a general aquifer as potentially dominant for a state, that aquifer needed a minimum of 25 wells and it needed to be a designated (not unknown) aquifer. A dominant general aquifer was not considered for Ohio, even though the distribution of high As concentrations appeared to be greater in the sandstone aquifer than other aquifers (33% in the sandstone compared to 20% of wells in the sand and gravel aquifer), because the six wells in the sandstone aquifer were too few to generate confidence in the sample.

Map layers of bedrock geology and well locations for states with potentially dominant general aquifers were examined in detail in ArcMap to decide whether to take action by removing wells for the regression analysis. For the states in question, at least two maps of well locations overlain onto geology were scrutinized: one map showing wells from the potentially dominant layered aquifer and one or more maps showing wells in each of the subordinate aquifers. The visual snapshots of contrasting well locations from different types of aquifers relative to the underlying geology were used to justify an action for dealing with the potentially layered aquifer situation. The idea was that removal of some well data from input to the regression models, if certain conditions were met, could be justified in order to improve the predictive power of the regression models. Predictive power could be improved because all of the regression variables are based on a 2-dimensional grid (using x and y map locations); the presence of two different populations of the dependent variable (arsenic concentrations GT1 or GT10) from different aquifer layers, where one population has a higher concentration than the other, could result in dilution of the signal in the regression estimation.

Necessary conditions for omitting well records were that wells in the respective state tapped at least 2 different aquifers, wells from at least 2 different aquifers were interspersed throughout some part of the state (i.e. were not in completely distinct geographic areas because then they wouldn't be stacked), and the arsenic concentrations of wells in the different aquifers appeared to be different. Most states had situations with wells that resulted in "no action" or no removal of well records (table S2, right-most column). For example, figure SI\_2\_1 shows the ArcMap plots for the 2 potential layered aquifers in Pennsylvania. The sandstone aquifer (fig. SI\_2\_1a), which has 6 percent of wells with arsenic concentration > 10 ug/L is potentially dominant over the carbonate and sandstone aquifer (fig. SI\_2\_1b, 3 percent of wells with arsenic concentration > 10 ug/L). However, because wells for these two types of aquifers generally do not overlap, layering is not likely to dilute the regression models, and no action is appropriate. There were 6 types of justification for no action: (1) cases of potentially dominant layered aquifers if the wells in different aquifers were in distinct parts of the state (illustrated with data from Pennsylvania; fig. SI\_2\_1); (2) there was an insufficient number of wells in one or more of the aquifers to make a difference (seen with data from Connecticut); (3) the distribution of high arsenic concentrations (> 10 ug/L) in the layered aquifers was not different enough to distinguish one aquifer from another (seen with data from Arkansas); (4) the modeled geologic units had similar percentages of wells with > 10 ug/L to eliminate the potential dilution effect of the layered aquifer (seen with data from Kansas); (5) wells in unknown aquifers had higher concentrations of arsenic than wells in named aquifers (seen with data from Washington); or (6) there was only one type of generic aquifer identified for wells in the State (seen with data from South Dakota).

Results from this analysis suggested removal of 208 records for the regression analysis for wells in Idaho, Indiana, Missouri, Nebraska, and Oregon, as described in the "Action and justification" column of table S2. If locations of wells from the potentially dominant aquifer and at least one other aquifer were interspersed within some area of the State, then we assumed the presence of a layered aquifer system in that area. Furthermore, if data from wells in the different layers suggested distinct arsenic populations (that is different percents of arsenic > 10 ug/L), then omission of well records from the subordinate aquifer(s) was justified. For example, using data from Nebraska, wells in the sand and gravel aquifer (fig. SI\_2\_2a) are interspersed in the x-y plane with wells in other aquifers (fig. SI\_2\_2b). Additionally, wells in the sand and gravel aquifer showed a potentially different population of arsenic concentrations > 10 ug/L than wells in other aquifers (table S2; 10 percent for sand and gravel versus 0 percent each for sandstone and unknown aquifers). These conditions justified including the 15 Nebraska well records that were not in the sand and gravel aquifer with the set of wells removed from the original dataset.

A comparison of regression results between the full dataset and the test dataset with these 208 wells removed showed that there are small differences in logistic regression model results when some wells are removed from the dataset via the subordinate aquifer analysis. Differences in classification table results for predictions of As > 1, if present, were all less than 0.3 percent. Differences in classification table results for predictions of As > 10 were slightly more substantial; improvements resulting from removing 208 wells were up to 1 percent for sensitivity, false positives and false negatives at a couple of cutpoints. However, the percent correct did not change by more than 0.1 for any cutpoint, most classification table metrics at most cutpoints shows no improvements, and the c value and the H&L statistic were slightly worse in the model with wells removed. Because these improvements to the logistic regression models are negligible, probably because the adjustment only affected 1 percent of the data, the full dataset was used in all subsequent analyses.

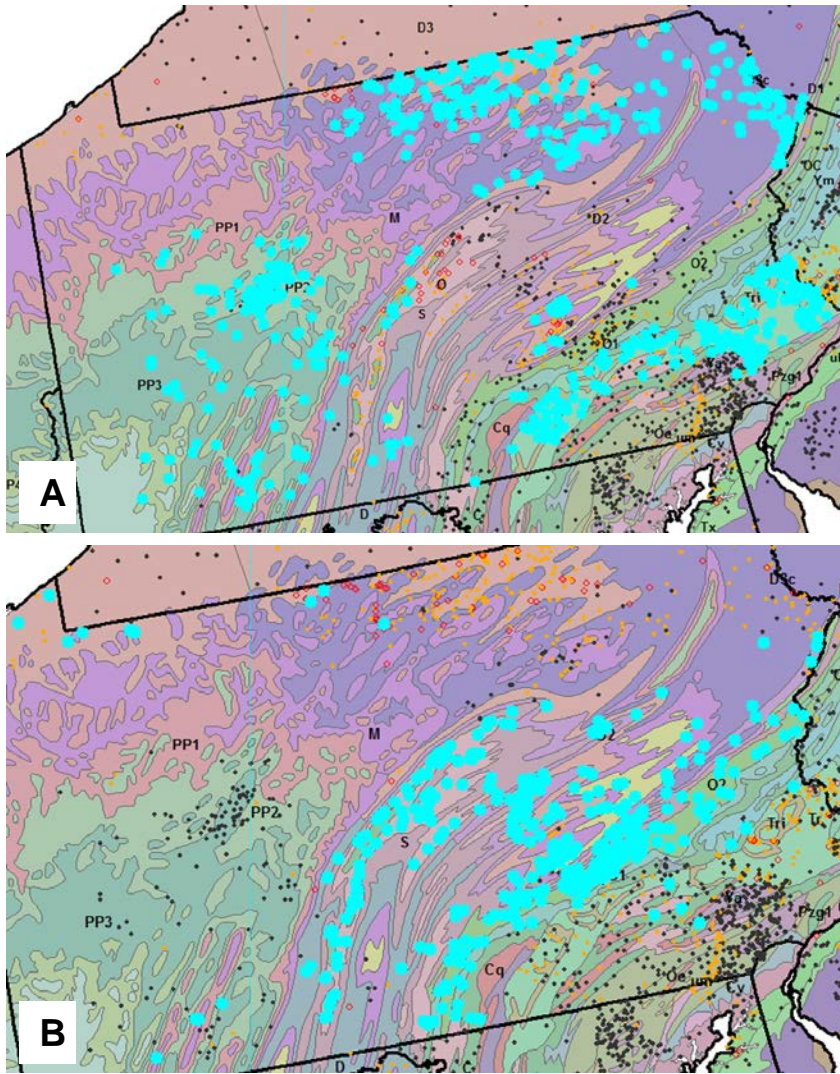

Figure SI\_2\_1. Maps of Pennsylvania with underlying geology showing wells selected from *A*, the sandstone aquifer and *B*, carbonate and sandstone aquifer.



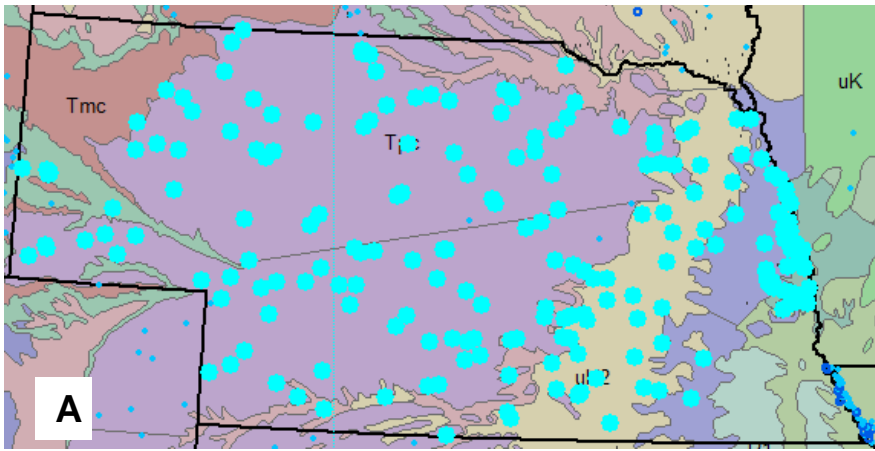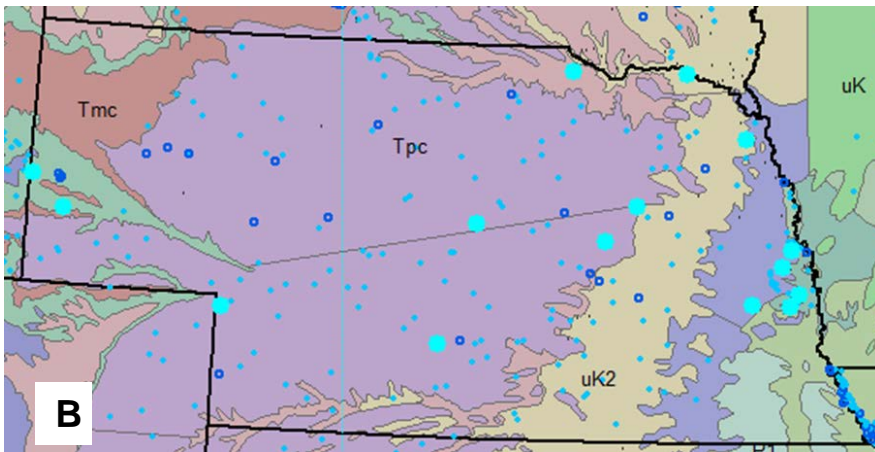

Figure SI\_2\_2. Maps of Nebraska with underlying geology showing wells selected from *A*, the sand and gravel aquifer and *B*, all other aquifers.

**Table SL2.** Number and percent of wells with high arsenic concentrations by type of aquifer, potentially dominant layered aquifer, and action for layered aquifer situations, by State.

[BDRK, bedrock; CARB & SDST, carbonate and sandstone; CARB, carbonate rock; CRY, crystalline rock; SD & G, sand and gravel; SDST, sandstone; SemiS, semiconsolidated sand; UNK, unknown, VOLC, volcanic rock; Action and justification column explanations– No action: geology, No action because modeled geologic units eliminate potential dilution effect of layered aquifer; No Action: similar distribution, No action because the arsenic distribution in layered aquifers is similar; No Action: small effect, No action because effect of removing wells would be small; No Action necessary, Not a layered aquifer situation; No Action: unknown, No action because wells in unknown aquifers have higher concentrations than wells in named aquifers; No Action: distinct areas, Not a layered aquifer situation because wells are in different parts of the state.]

| State                                      | BDRK | CARB & SDST | CARB | CRYS | SD & G | SDST | SemiS | UNK | VOLC  | Potentially dominant layered aquifer | Action and justification for area with potentially layered aquifers                                                                                         |
|--------------------------------------------|------|-------------|------|------|--------|------|-------|-----|-------|--------------------------------------|-------------------------------------------------------------------------------------------------------------------------------------------------------------|
| Number of wells and percent having As > 10 |      |             |      |      |        |      |       |     |       |                                      |                                                                                                                                                             |
| Alaska                                     | 3    |             |      |      | 42     |      |       |     | 29    | SD & G                               | ?? Don't have geologic map of Alaska                                                                                                                        |
|                                            | 0    |             |      |      | 29     |      |       |     | 24    |                                      |                                                                                                                                                             |
| Alabama                                    |      | 2           | 2    |      | 27     | 3    |       |     | 5     | None                                 | No Action: small effect and similar distribution                                                                                                            |
|                                            |      | 0           | 0    |      | 0      | 0    |       |     | 0     |                                      |                                                                                                                                                             |
| Arkansas                                   |      |             | 41   |      | 28     | 14   |       |     | 1     | None                                 | No Action: similar distribution                                                                                                                             |
|                                            |      |             | 0    |      | 0      | 0    |       |     | 0     |                                      |                                                                                                                                                             |
| Arizona                                    | 10   |             | 3    |      | 245    |      |       |     | 30    | SD & G                               | No action: geology (Q and Tpc)                                                                                                                              |
|                                            | 10   |             | 33   |      | 63     |      |       |     | 26    |                                      |                                                                                                                                                             |
| California                                 |      |             |      |      | 1,2    |      | 24    |     | 16    | SD & G                               | No Action: geology (Q, Kg)                                                                                                                                  |
|                                            |      |             |      |      | 37     |      | 0     |     | 2     |                                      |                                                                                                                                                             |
|                                            |      |             |      |      | 10     |      | 6     |     | 6     |                                      |                                                                                                                                                             |
| Colorado <sup>1</sup>                      |      |             | 30   |      | 284    | 26   | 51    |     | 14    | SDST, SD & G                         | No Action: similar distribution                                                                                                                             |
|                                            |      |             | 0    |      | 3      | 4    | 2     |     | 8     |                                      |                                                                                                                                                             |
| Connecticut                                |      |             |      | 17   | 10     | 4    |       |     | 1     | SDST                                 | No Action: small effect                                                                                                                                     |
|                                            |      |             |      | 6    | 0      | 25   |       |     | 0     |                                      |                                                                                                                                                             |
| Delaware                                   |      |             | 12   |      | 13     |      |       |     |       | None                                 | No Action: similar distribution                                                                                                                             |
|                                            |      |             | 0    |      | 0      |      |       |     |       |                                      |                                                                                                                                                             |
| Florida                                    |      | 1           | 94   |      | 43     |      |       |     | 16    | CARB                                 | No Action: distinct areas                                                                                                                                   |
|                                            |      | 0           | 3    |      | 0      |      |       |     | 0     |                                      |                                                                                                                                                             |
| Georgia                                    |      | 1           | 80   |      | 5      | 2    |       |     | 3     | SD & G                               | No Action: small effect                                                                                                                                     |
|                                            |      | 0           | 1    |      | 20     | 0    |       |     | 0     |                                      |                                                                                                                                                             |
| Iowa                                       |      |             |      |      | 72     | 2    | 1     |     |       | SD & G                               | No Action: small effect                                                                                                                                     |
|                                            |      |             |      |      | 3      | 0    | 0     |     |       |                                      |                                                                                                                                                             |
| Idaho                                      |      |             | 7    |      | 525    |      | 9     |     | 1,090 | SD & G                               | Remove wells for analysis that are VOLC (geologic unit Qv); this is the only area where wells in different aquifers are interspersed within a geologic unit |
|                                            |      |             | 14   |      | 17     |      | 11    |     | 20    |                                      |                                                                                                                                                             |
|                                            |      |             |      |      | 3      |      |       |     | 3     |                                      |                                                                                                                                                             |
| Illinois                                   |      |             |      |      | 65     |      |       |     | 17    | SD & G                               | No Action: similar distribution                                                                                                                             |
|                                            |      |             |      |      | 22     |      |       |     | 24    |                                      |                                                                                                                                                             |
| Indiana                                    | 23   |             | 17   |      | 147    | 6    |       |     | 5     | SD & G                               | Remove wells for analysis whose aquifer is not designated as SD & G                                                                                         |
|                                            | 0    |             | 0    |      | 6      | 0    |       |     | 20    |                                      |                                                                                                                                                             |
| Kansas                                     |      |             | 4    |      | 125    | 80   | 5     |     | 37    | SD & G                               | No Action: geology (Tpc and Q) and distinct areas                                                                                                           |
|                                            |      |             | 0    |      | 2      | 1    | 0     |     | 11    |                                      |                                                                                                                                                             |

|                |    |    |    |   |     |    |    |                     |                                                                                                                                                                     |
|----------------|----|----|----|---|-----|----|----|---------------------|---------------------------------------------------------------------------------------------------------------------------------------------------------------------|
| Kentucky       |    |    |    |   | 30  |    | 14 | SDST                | No Action: similar distribution                                                                                                                                     |
|                |    |    |    |   | 0   |    | 0  |                     |                                                                                                                                                                     |
| Louisiana      |    |    |    |   | 123 |    |    | Single aquifer      | No Action necessary                                                                                                                                                 |
|                |    |    |    |   | 1   |    |    |                     |                                                                                                                                                                     |
| Massachusetts  |    |    | 78 | 8 | 3   |    | 48 | CRYS                | No Action: unknown                                                                                                                                                  |
|                |    |    | 14 | 0 | 33  |    | 3  |                     |                                                                                                                                                                     |
|                |    |    |    |   |     |    | 16 |                     |                                                                                                                                                                     |
| Maryland       | 18 | 10 |    |   | 149 | 42 | 1  | SD & G, CARB & SDST | No Action: geology (D, Tm, Qp)                                                                                                                                      |
|                | 11 | 0  |    |   | 12  | 2  | 0  |                     |                                                                                                                                                                     |
| Maine          |    |    |    |   |     |    | 67 | Single aquifer      | No Action necessary                                                                                                                                                 |
|                |    |    |    |   |     |    | 96 |                     |                                                                                                                                                                     |
| Michigan       |    |    |    |   | 40  | 12 | 31 | SD & G              | No Action: distinct areas                                                                                                                                           |
|                |    |    |    |   | 10  | 0  | 87 |                     |                                                                                                                                                                     |
| Minnesota      |    |    |    |   | 8,0 |    |    | Single aquifer      | No Action necessary                                                                                                                                                 |
|                |    |    |    |   | 38  |    |    |                     |                                                                                                                                                                     |
|                |    |    |    |   | 13  |    |    |                     |                                                                                                                                                                     |
| Missouri       |    | 11 |    |   | 245 | 97 | 5  | SD & G              | Remove wells for analysis in geologic unit PP3 that are not SD & G; this is the only area where wells in different aquifers are interspersed within a geologic unit |
|                |    | 5  |    |   |     |    |    |                     |                                                                                                                                                                     |
|                |    | 1  |    |   | 9   | 0  | 0  |                     |                                                                                                                                                                     |
| Mississippi    |    |    |    |   | 37  |    |    | Single aquifer      | No Action necessary                                                                                                                                                 |
|                |    |    |    |   | 5   |    |    |                     |                                                                                                                                                                     |
| Montana        |    |    |    |   | 405 |    |    | Single aquifer      | No Action necessary                                                                                                                                                 |
|                |    |    |    |   | 21  |    |    |                     |                                                                                                                                                                     |
| North Carolina |    | 11 |    |   | 1   |    | 9  | CARB                | No Action: small effect                                                                                                                                             |
|                |    | 7  |    |   |     |    |    |                     |                                                                                                                                                                     |
|                |    | 5  |    |   | 0   |    | 20 |                     |                                                                                                                                                                     |
| North Dakota   |    |    |    |   | 10  | 13 | 1  | SD & G              | No Action: small effect                                                                                                                                             |
|                |    |    |    |   | 20  | 8  | 0  |                     |                                                                                                                                                                     |
| Nebraska       |    |    |    |   | 209 | 10 | 5  | SD & G              | Remove wells for analysis whose aquifer is not designated as sand and gravel                                                                                        |
|                |    |    |    |   | 10  | 0  | 0  |                     |                                                                                                                                                                     |
| New Hampshire  |    |    | 45 |   |     |    |    | Single aquifer      | No Action necessary                                                                                                                                                 |
|                |    |    | 5  |   |     |    |    |                     |                                                                                                                                                                     |
|                |    |    | 18 |   |     |    |    |                     |                                                                                                                                                                     |
| New Jersey     |    |    |    |   |     | 13 |    | Single aquifer      | No Action necessary                                                                                                                                                 |
|                |    |    |    |   |     | 3  |    |                     |                                                                                                                                                                     |
|                |    |    |    |   |     | 8  |    |                     |                                                                                                                                                                     |
| New Mexico     |    | 1  |    |   | 64  |    |    | Single aquifer      | No Action necessary                                                                                                                                                 |
|                |    | 0  |    |   | 14  |    |    |                     |                                                                                                                                                                     |
| Nevada         |    |    |    |   | 68  |    | 17 | None                | No Action: similar distribution                                                                                                                                     |
|                |    |    |    |   | 62  |    | 8  |                     |                                                                                                                                                                     |
|                |    |    |    |   |     |    | 61 |                     |                                                                                                                                                                     |
| New York       | 1  |    | 46 | 1 | 128 | 14 | 1  | SD & G, SDST        | No Action: geology (Ym) and equal distribution                                                                                                                      |
|                | 0  |    | 0  | 0 | 7   | 9  | 0  |                     |                                                                                                                                                                     |
|                |    |    |    |   | 5   | 5  | 0  |                     |                                                                                                                                                                     |
|                |    |    |    |   | 0   | 0  | 0  |                     |                                                                                                                                                                     |
| Ohio           |    | 9  | 13 |   | 82  | 6  | 10 | None                | No Action: distinct areas                                                                                                                                           |
|                |    | 0  | 2  |   | 20  | 33 | 0  |                     |                                                                                                                                                                     |
|                |    |    | 17 |   |     |    |    |                     |                                                                                                                                                                     |
| Oklahoma       |    |    |    |   |     | 50 |    | Single aquifer      | No Action necessary                                                                                                                                                 |
|                |    |    |    |   |     | 8  |    |                     |                                                                                                                                                                     |

| 3                   |              |         |             |              |          |              |        |                |                                                                                                                                 |
|---------------------|--------------|---------|-------------|--------------|----------|--------------|--------|----------------|---------------------------------------------------------------------------------------------------------------------------------|
| Oregon <sup>2</sup> |              |         | 225         |              | 27       | 60           | 10     | SD & G         | Remove wells for analysis that are in the SemiS or VOLC aquifers because they are interspersed with wells in the SD & G aquifer |
|                     |              |         | 8           |              | 4        | 17           | 0      |                |                                                                                                                                 |
| Pennsylvania        | 40<br>1<br>3 |         |             | 65<br>6<br>6 |          |              |        | SDST           | No Action: distinct areas                                                                                                       |
| South Carolina      |              | 48<br>0 | 1<br>0      |              |          |              |        | Single aquifer | No Action necessary                                                                                                             |
| South Dakota        |              |         | 262<br>4    |              |          |              |        | Single aquifer | No Action necessary                                                                                                             |
| Tennessee           | 23<br>0      | 25<br>0 | 19<br>0     |              |          |              |        |                | No Action: similar distribution                                                                                                 |
| Texas               |              |         | 1,768<br>13 |              |          |              |        | Single aquifer | No Action necessary                                                                                                             |
| Utah                |              |         | 96<br>7     | 18<br>0      | 30<br>27 | 40<br>8      |        | SemiS          | No Action: small effect                                                                                                         |
| Washington          |              |         | 80<br>4     |              |          | 60<br>3<br>9 | 1<br>0 | UNK            | No Action: unknown                                                                                                              |
| Wisconsin           |              | 52<br>2 | 137<br>2    | 62<br>0      |          |              |        | None           | No Action: similar distribution                                                                                                 |
| West Virginia       | 38<br>5      |         | 26<br>23    | 10<br>8<br>3 |          | 17<br>0      |        | SD & G         | No Action: geology (PP4)                                                                                                        |
| Wyoming             | 6<br>0       | 8<br>13 | 95<br>0     | 59<br>2      | 12<br>0  | 14<br>7      |        | None           | No Action: distinct areas                                                                                                       |

<sup>1</sup>Wells in carbonate rock and of unknown aquifer overlap each other more than other aquifers

<sup>2</sup>Wells in sand and gravel and unknown aquifers are interspersed in Tmv group only

SI\_3. Logistic regression model coefficients and coefficient diagnostics for probability of arsenic > 10 µg/L

[All parameters have 1 degree of freedom; GeoChem, stream sediment geochemistry; SurfGeo, surficial geology; KB, Bedrock geology: King and Beikman; HydrLand, hydrologic landscape regions and variables]

| Model variable | Dataset (from SI_1)     | Description of variable                            | Model coefficient | Standard error | Wald chi-square <sup>1</sup> | Pr > ChiSq <sup>2</sup> | Exp(Est) <sup>3</sup> | Standardized coefficient |
|----------------|-------------------------|----------------------------------------------------|-------------------|----------------|------------------------------|-------------------------|-----------------------|--------------------------|
| Intercept      | --                      |                                                    | -0.4071           | 0.3217         | 1.6009                       | 0.2058                  | 0.666                 | --                       |
| as_idw_c2      | GeoChem                 | Average arsenic concentrations in the c2 horizon   | 0.0281            | 0.00649        | 18.8291                      | <.0001                  | 1.029                 | 0.113                    |
| be_idw_c       | GeoChem                 | Average beryllium concentrations in the c horizon  | 0.227             | 0.0575         | 15.5837                      | <.0001                  | 1.255                 | 0.0797                   |
| BFI            | Base flow index         | lower is less base flow                            | -0.0161           | 0.00187        | 73.5277                      | <.0001                  | 0.984                 | -0.1643                  |
| bi_idw_c       | GeoChem                 | Average bismuth concentrations in the c horizon    | -1.7461           | 0.4267         | 16.7437                      | <.0001                  | 0.174                 | -0.1179                  |
| Cv             | KB                      | Cambrian volcanic rocks                            | 1.5296            | 0.4782         | 10.2327                      | 0.0014                  | 4.616                 | 0.0495                   |
| D              | KB                      | Devonian                                           | 2.3586            | 0.4593         | 26.3739                      | <.0001                  | 10.576                | 0.0608                   |
| D3             | KB                      | Upper Devonian                                     | 1.0811            | 0.2155         | 25.1791                      | <.0001                  | 2.948                 | 0.0751                   |
| De_geo         | KB                      | Devonian, eugeosynclinal                           | 2.4582            | 0.22           | 124.8841                     | <.0001                  | 11.684                | 0.1331                   |
| DSe            | KB                      | Devonian and Silurian, eugeosynclinal              | 2.2263            | 0.1563         | 202.9346                     | <.0001                  | 9.266                 | 0.1803                   |
| HGA            | STATSGO                 | Hydrologic soil group A                            | -0.0087           | 0.002          | 18.9205                      | <.0001                  | 0.991                 | -0.008                   |
| IVR            | SurfGeo                 | Alkaline intrusive volcanic rock                   | -2.3869           | 0.6968         | 11.7359                      | 0.0006                  | 0.092                 | -0.0556                  |
| lc11           | Landcover               | Open water                                         | 0.7503            | 0.1659         | 20.4643                      | <.0001                  | 2.118                 | 0.0557                   |
| lc82           | Landcover               | Row crops                                          | 0.3544            | 0.0794         | 19.915                       | <.0001                  | 1.425                 | 0.0709                   |
| M              | KB                      | Mississippian                                      | 1.6014            | 0.4375         | 13.4009                      | 0.0003                  | 4.96                  | 0.0575                   |
| mo_idw_a       | GeoChem                 | Average molybdenum concentrations in the c horizon | -0.1724           | 0.0376         | 20.9854                      | <.0001                  | 0.842                 | -0.1117                  |
| Oe             | KB                      | Ordovician, eugeosynclinal                         | 2.1915            | 0.2359         | 86.2648                      | <.0001                  | 8.948                 | 0.1241                   |
| Percent_ti     | Percent Tile Drains     | --                                                 | 0.0338            | 0.00328        | 106.3286                     | <.0001                  | 1.034                 | 0.1442                   |
| PPT81_10       | Precipitation           | --                                                 | -0.0887           | 0.00445        | 396.6356                     | <.0001                  | 0.915                 | -0.7063                  |
| Pzg1           | KB                      | Lower Paleozoic granitic rocks                     | 2.2046            | 0.2319         | 90.4046                      | <.0001                  | 9.067                 | 0.1221                   |
| Pzg2           | KB                      | Middle Paleozoic granitic rocks                    | 2.2257            | 0.1799         | 153.0722                     | <.0001                  | 9.26                  | 0.1557                   |
| Pzmi           | KB                      | Phanerozoic mafic intrusives                       | 2.5313            | 0.3564         | 50.4421                      | <.0001                  | 12.57                 | 0.0763                   |
| Q              | KB                      | Quaternary                                         | 0.5623            | 0.0927         | 36.7672                      | <.0001                  | 1.755                 | 0.1095                   |
| Qp             | KB                      | Pleistocene                                        | 1.2272            | 0.1985         | 38.2307                      | <.0001                  | 3.412                 | 0.1013                   |
| recharge       | Recharge to groundwater | --                                                 | 0.00375           | 0.000369       | 103.4729                     | <.0001                  | 1.004                 | 0.2909                   |

|            |                |                                                            |          |          |          |        |        |         |
|------------|----------------|------------------------------------------------------------|----------|----------|----------|--------|--------|---------|
| RELIEF     | HydrLand       | maximum elevation minus minimum elevation in the watershed | -0.00067 | 0.000085 | 61.9952  | <.0001 | 0.999  | -0.1543 |
| ROCKDEPAVE | STATSGO        | Average depth to rock                                      | 0.0201   | 0.0037   | 29.4895  | <.0001 | 1.02   | 0.1234  |
| S3         | KB             | Upper Silurian (Cayugan)                                   | -3.5907  | 1.0241   | 12.2928  | 0.0005 | 0.028  | -0.1264 |
| SAND       | HydrLand       | Average percent of sand in soil                            | 0.00872  | 0.00221  | 15.6126  | <.0001 | 1.009  | 0.0761  |
| sb_idw_c   | GeoChem        | Average antimony concentrations in the c horizon           | 0.3636   | 0.0391   | 86.6457  | <.0001 | 1.438  |         |
| Se         | KB             | Silurian, eugeosynclinal                                   | 2.5402   | 0.1526   | 277.2204 | <.0001 | 12.682 | 0.191   |
| SLOPEAVE   | STATSGO        | Average slope                                              | 0.0338   | 0.0045   | 56.3191  | <.0001 | 1.034  | 0.01557 |
| SLS        | SurfGeo        | Saline lake sediment                                       | 1.2504   | 0.1843   | 46.0366  | <.0001 | 3.492  | 0.0783  |
| strmden    | Stream density | --                                                         | 1.7426   | 0.4669   | 13.9332  | 0.0002 | 5.712  | 0.0576  |
| Tm         | KB             | Miocene                                                    | 1.0529   | 0.2435   | 18.6984  | <.0001 | 2.866  | 0.0752  |
| Tmc        | KB             | Miocene, continental                                       | 0.9262   | 0.1839   | 25.3703  | <.0001 | 2.525  | 0.06    |
| Tp         | KB             | Pliocene                                                   | 1.6539   | 0.23     | 51.7139  | <.0001 | 5.228  | 0.0765  |
| Tpc        | KB             | Pliocene, continental                                      | 1.0682   | 0.1006   | 112.7915 | <.0001 | 2.91   | 0.1493  |
| Tpv        | KB             | Pliocene, volcanic                                         | 1.8952   | 0.1973   | 92.2267  | <.0001 | 6.654  | 0.0948  |
| Tr         | KB             | Triassic                                                   | 0.8601   | 0.2242   | 14.7241  | 0.0001 | 2.364  | 0.068   |
| uK3        | KB             | Taylor Group                                               | -2.2969  | 0.5831   | 15.5185  | <.0001 | 0.101  | -0.1991 |
| WEG        | STATSGO        | Average values for wind erodibility group                  | -0.1314  | 0.0201   | 42.8712  | <.0001 | 0.877  | -0.1194 |
| WTDEPAVE   | STATSGO        | Average depth to water                                     | -0.2133  | 0.0252   | 71.3999  | <.0001 | 0.808  | -0.1697 |

<sup>1</sup>The test statistic testing the null hypothesis that a predictor's regression coefficient is zero, given the other predictor variables are in the model. It is the squared ratio of the estimate to the standard error of the respective predictor.

<sup>2</sup>The p-value of the Wald chi-square test statistic.

<sup>3</sup>The odds ratio determined by exponentiating the estimate. This is interpreted as: for a one unit change in the predictor variable, the odds ratio for a positive outcome is expected to change by the respective coefficient, given the other variables in the model are held constant.

SI\_4. Standardized Pearson residuals of the predicted probabilities of arsenic exceeding 10 micrograms per liter in groundwater for the logistic regression model.

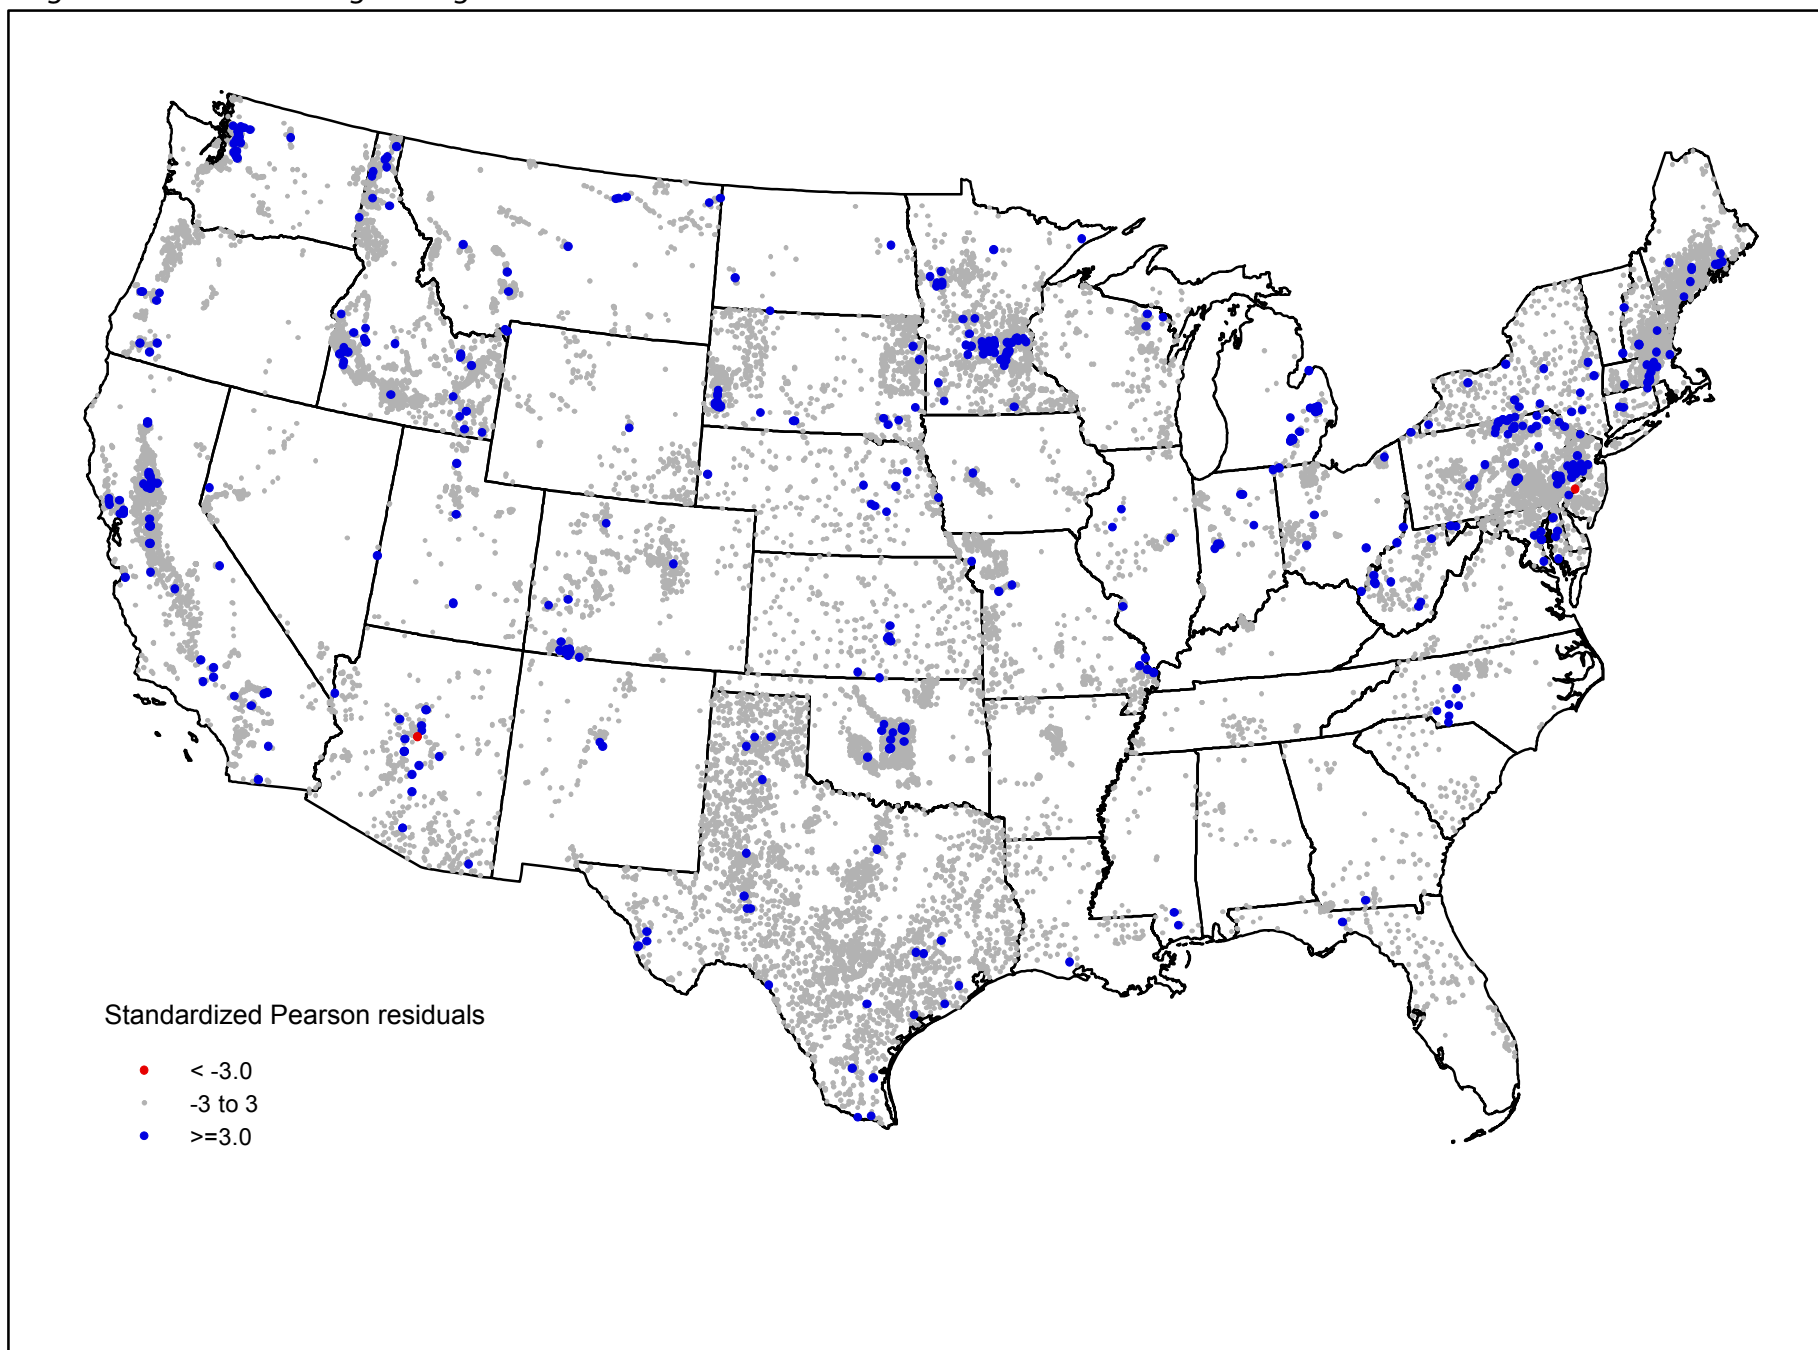

**SI 5. Influence diagnostics for individual observations in logistic model to predict As > 10 µg/L.**

The table below shows some of the influence diagnostic statistics and other information for these potential outliers. Although some observed As concentrations are less than and others are greater than 10, predicted values are all less than 10 µg/L. In general, small predicted values correspond to large observation values and large predicted values correspond to small observation values. That this model outcome is opposite from the expected outcome illustrates why these points might be influential. The three table sections show model results with (A) all values; (B) the 2 most extreme influential cases deleted; and (C) 18 additional influential cases deleted. There is almost no difference in model results, as indicated by information in rows below that begin with ‘AIC’, between these scenarios.

| Results of logistic regression models with 0, 2, and 20 most influential points removed                                                             |                   |                              |                              |           |                                |          |       |       |
|-----------------------------------------------------------------------------------------------------------------------------------------------------|-------------------|------------------------------|------------------------------|-----------|--------------------------------|----------|-------|-------|
| Case                                                                                                                                                | Unique identifier | Binary variable <sup>1</sup> | Arsenic Concentration (µg/L) |           | Influence Diagnostic Statistic |          |       | State |
|                                                                                                                                                     |                   |                              | Observed                     | Predicted | Standard Pearson Residual      | Leverage | DBETA |       |
| <b>1. Full model</b>                                                                                                                                |                   |                              |                              |           |                                |          |       |       |
| AIC: G <sub>M</sub> = 9,603; p = < 0.0001; R <sup>2</sup> = 0.13; R <sup>2</sup> (max re-scaled)= 0.26; H&L = 0.0035; c = 0.807                     |                   |                              |                              |           |                                |          |       |       |
| 14220                                                                                                                                               | 430014075141901   | 1                            | 17.4                         | 0.0002    | 65.0878                        | 0.0003   | -0.03 | NY    |
| 17475                                                                                                                                               | 461738112441701   | 0                            | 0.2                          | 0.1675    | -0.4485                        | 0.1818   | 0.01  | MT    |
| <b>2. 2 Most Extreme Influential Cases Deleted</b>                                                                                                  |                   |                              |                              |           |                                |          |       |       |
| AIC: G <sub>M</sub> = 9,584 p = < 0.0001; R <sup>2</sup> = 0.13; R <sup>2</sup> (max re-scaled)= 0.26; H&L = 0.0061; c = 0.808                      |                   |                              |                              |           |                                |          |       |       |
| 3704                                                                                                                                                | 333408111490301   | 1                            | 11                           | 0.0148    | 8.1568                         | 0.0080   | -0.01 | AZ    |
| 3821                                                                                                                                                | 334832111385401   | 1                            | 12.24                        | 0.0173    | 7.5400                         | 0.0062   | 0.00  | AZ    |
| 3953                                                                                                                                                | 342048111572501   | 0                            | 2                            | 0.8903    | -2.8495                        | 0.0087   | 0.02  | AZ    |
| 9682                                                                                                                                                | 395608075042601   | 0                            | 1                            | 0.8670    | -2.5528                        | 0.0388   | 0.05  | NJ    |
| 11902                                                                                                                                               | 411631098124901   | 1                            | 10.9                         | 0.0044    | 15.0170                        | 0.0015   | -0.05 | NE    |
| 16399                                                                                                                                               | 444239111055301   | 1                            | 10.1                         | 0.1035    | 2.9427                         | 0.0390   | 0.00  | NJ    |
| 16441                                                                                                                                               | 444533095310301   | 0                            | <1                           | 0.2967    | -0.6496                        | 0.0027   | 0.00  | MN    |
| 16442                                                                                                                                               | 444534111104601   | 1                            | 12.8                         | 0.0451    | 4.5998                         | 0.0187   | 0.00  | MT    |
| 16537                                                                                                                                               | 445139096553301   | 0                            | <0.5                         | 0.0064    | -0.0804                        | 0.0022   | 0.00  | SD    |
| 16538                                                                                                                                               | 445142096394501   | 1                            | 13                           | 0.0050    | 14.0837                        | 0.0017   | 0.00  | SD    |
| 16794                                                                                                                                               | 451138096391401   | 0                            | 0.5                          | 0.0605    | -0.2539                        | 0.0004   | 0.00  | SD    |
| 16795                                                                                                                                               | 451138096531301   | 1                            | 12                           | 0.0050    | 14.1664                        | 0.0017   | -0.01 | SD    |
| 17445                                                                                                                                               | 461509112484701   | 0                            | 0.8                          | 0.1345    | -0.3942                        | 0.1510   | 0.01  | MT    |
| 17490                                                                                                                                               | 461841114110701   | 0                            | <1                           | 0.1710    | -0.4542                        | 0.0043   | 0.00  | MT    |
| 17492                                                                                                                                               | 461848112470601   | 0                            | 1.2                          | 0.1317    | -0.3895                        | 0.1496   | 0.01  | MT    |
| 17533                                                                                                                                               | 462324116282101   | 0                            | <1                           | 0.0550    | -0.2412                        | 0.0007   | 0.00  | ID    |
| 17535                                                                                                                                               | 462345112501101   | 0                            | 2.2                          | 0.0915    | -0.3173                        | 0.1410   | 0.01  | MT    |
| 18487                                                                                                                                               | 480933120040801   | 0                            | 0.5                          | 0.7564    | -1.7622                        | 0.0766   | 0.05  | WA    |
| <b>3. 18 Additional Influential Cases Deleted</b>                                                                                                   |                   |                              |                              |           |                                |          |       |       |
| AIC: G <sub>M</sub> = 9,499; p = < 0.0001; R <sup>2</sup> = 0.13; R <sup>2</sup> (max re-scaled)= 0.27; H&L = 0.0136; c = 0.81                      |                   |                              |                              |           |                                |          |       |       |
| 1 The binary variable for logistic regression is 0 or 1 depending on whether the arsenic concentration is less (0) than or greater (1) than 10 µg/L |                   |                              |                              |           |                                |          |       |       |
